# Supplementary material for: M-protein and other intrinsic virulence factors of Streptococcus pyogenes are encoded on an ancient pathogenicity island
Source: PubMed Central journal article supplement (PMC2683870; doi:10.1186/1471-2164-10-198), 2009-04-27
Supplement: 1471-2164-10-198-S1.pdf [file 1471-2164-10-198-S1.pdf]

**Additional file 1:** Gene content of the non-phagic 47-kb SSR of M1 *S. pyogenes* SF370.

| Index* | Length  |         |        |      | PID      | Synonym | Gene        | Sharing              | Product                                          | Region defined by the TA skew analysis                     |
|--------|---------|---------|--------|------|----------|---------|-------------|----------------------|--------------------------------------------------|------------------------------------------------------------|
|        | 5'      | 3'      | Strand | [aa] |          |         |             |                      |                                                  |                                                            |
|        | 1663725 | 1663797 | +      | -    | 15674250 | spyt56  | -           | All                  | Lys-tRNA                                         | Start -> 1663706<br>Region defined by the TA skew analysis |
| 1      | 1663936 | 1664376 | +      | 146  | 15675783 | spy1994 | -           | 2,3,6,7,8,9,10,11,12 | pai1 protein (theoretical repressor)             |                                                            |
| 2      | 1664431 | 1664937 | +      | 168  | 15675784 | spy1995 | <i>flaR</i> | 2,3,6,7,8,9,10,11,12 | topology modulation protein                      |                                                            |
| 3      | 1665186 | 1665887 | +      | 233  | 15675785 | spy1998 | <i>smeZ</i> | 2,4,6,7,8,9,10,11,12 | <b>mitogenic exotoxin Z</b>                      |                                                            |
| 4      | 1666171 | 1666437 | -      | 88   | 15675786 | spy1999 | -           | 2,3,4,5,6,9,10,11,12 | hypothetical protein                             |                                                            |
| 5      | 1666616 | 1668244 | +      | 542  | 15675787 | spy2000 | <i>dppA</i> | All                  | surface lipoprotein                              |                                                            |
| 6      | 1668357 | 1669334 | +      | 325  | 15675788 | spy2001 | <i>dppB</i> | All                  | transmembrane transport protein                  |                                                            |
| 7      | 1669331 | 1670152 | +      | 273  | 15675789 | spy2002 | <i>dppC</i> | All                  | transmembrane transport protein                  |                                                            |
| 8      | 1670164 | 1670967 | +      | 267  | 15675790 | spy2003 | <i>dppD</i> | All                  | ATPase protein                                   |                                                            |
| 9      | 1670951 | 1671577 | +      | 208  | 15675791 | spy2004 | <i>dppE</i> | All                  | ATPase protein                                   |                                                            |
| 10     | 1671658 | 1671858 | -      | 66   | 15675792 | spy2005 | -           | All                  | hypothetical protein                             |                                                            |
| 11     | 1672027 | 1674504 | -      | 825  | 15675793 | spy2006 | -           | All                  | hypothetical protein                             |                                                            |
| 12     | 1674517 | 1675437 | -      | 306  | 15675794 | spy2007 | <i>lmb</i>  | All                  | <b>putative laminin adhesion</b>                 |                                                            |
| 13     | 1675673 | 1676812 | -      | 379  | 15675795 | spy2009 | -           | 2,3,6,12             | hypothetical protein                             |                                                            |
| 14     | 1676909 | 1680454 | -      | 1181 | 15675796 | spy2010 | <i>scpA</i> | All                  | <b>C5A peptidase precursor</b>                   |                                                            |
| 15     | 1680888 | 1682093 | +      | 401  | 15675797 | spy2013 | -           | 2,9,10               | IS1562 transposase                               |                                                            |
| 16     | 1682672 | 1683598 | -      | 308  | 15675798 | spy2016 | <i>sic</i>  | 2,9,10               | <b>inhibitor of complement-mediated lysis</b>    |                                                            |
| 17     | 1683787 | 1685241 | -      | 484  | 15675799 | spy2018 | <i>emm1</i> | All                  | <b>M protein type 1</b>                          |                                                            |
| 18     | 1685426 | 1687015 | -      | 529  | 15675800 | spy2019 | <i>mga</i>  | All                  | <b>M protein trans-acting positive regulator</b> |                                                            |

Start -> 1665608

Missing region in the M-protein-neg strain T11

|    |         |         |   |     |          |         |             |                        |                                                        |
|----|---------|---------|---|-----|----------|---------|-------------|------------------------|--------------------------------------------------------|
| 19 | 1687691 | 1687942 | - | 83  | 15675801 | spy2023 | -           | All                    | <b>hypothetical protein (mga-associated)</b>           |
| 20 | 1688021 | 1689646 | - | 541 | 15675802 | spy2025 | <i>isp</i>  | All                    | <b>immunogenic secreted protein precursor</b>          |
| 21 | 1689748 | 1691136 | - | 462 | 15675803 | spy2026 | -           | All                    | putative histidine kinase                              |
| 22 | 1691133 | 1691786 | - | 217 | 15675804 | spy2027 | -           | All                    | putative two-component response regulator              |
| 23 | 1691880 | 1693097 | - | 405 | 15675805 | spy2029 | -           | All                    | putative ABC transporter (ATP-binding protein)         |
| 24 | 1693110 | 1693784 | - | 224 | 15675806 | spy2031 | -           | All                    | putative ABC transporter (ATP-binding protein)         |
| 25 | 1693771 | 1695039 | - | 422 | 15675807 | spy2032 | -           | All                    | putative ATP-binding cassette transporter-like protein |
| 26 | 1695462 | 1695866 | - | 134 | 15675808 | spy2033 | -           | All                    | hypothetical protein                                   |
| 27 | 1695893 | 1696189 | - | 98  | 15675809 | spy2034 | -           | All                    | conversed hypothetical protein                         |
| 28 | 1696945 | 1697874 | - | 309 | 15675810 | spy2037 | <i>prsA</i> | All                    | peptidylprolyl isomerase                               |
| 29 | 1698661 | 1699857 | - | 398 | 15675811 | spy2039 | <i>speB</i> | All                    | <b>pyrogenic exotoxin B</b>                            |
| 30 | 1700129 | 1700299 | - | 56  | 15675812 | spy2040 | -           | 3,4,5,6,7,8,9,10,11,12 | hypothetical protein                                   |
| 31 | 1700383 | 1700514 | + | 43  | 15675813 | spy2041 | -           | 3,5,6,7,8,9,10,11,12   | hypothetical protein                                   |
| 32 | 1700798 | 1701640 | + | 280 | 15675814 | spy2042 | <i>ropB</i> | All                    | putative transcription regulator                       |
| 33 | 1701881 | 1702696 | - | 271 | 15675815 | spy2043 | <i>mf</i>   | All                    | <b>mitogenic factor</b>                                |
| 34 | 1703060 | 1703569 | + | 169 | 15675816 | spy2045 | -           | All                    | protein low temperature requirement C                  |
| 35 | 1703651 | 1704739 | - | 362 | 15675817 | spy2047 | <i>gldA</i> | All                    | glycerol dehydrogenase                                 |
| 36 | 1704796 | 1705464 | - | 222 | 15675818 | spy2048 | <i>mipB</i> | All                    | fructose-6-phosphate aldolase                          |
| 37 | 1705477 | 1707894 | - | 805 | 15675819 | spy2049 | <i>pflD</i> | All                    | putative pyruvate formate-lyase 2                      |
| 38 | 1708104 | 1709408 | - | 434 | 15675820 | spy2050 | -           | All                    | putative PTS system, enzyme IIC component              |
| 39 | 1709418 | 1709726 | - | 102 | 15675821 | spy2051 | -           | All                    | putative PTS system, enzyme IIB                        |
| 40 | 1709754 | 1710074 | - | 106 | 15675822 | spy2052 | -           | All                    | putative PTS system, enzyme III                        |

End -> 1710243

End -> 1708520

\*Forty coding genes are present within the boundaries revealed by TA skew analyses. Ten out of the 40 (25%) genes are coding for known virulence factors and represents 24% of all known virulence genes in M1 SF370 (bold). Boundaries of the natural isolate of M-protein-negative group A streptococcus T11 are shown and closely correspond to those obtained with the TA skew. Information of proteins shared by SF370 and the other eleven sequences is given by numbers corresponding to the index of Table 1. Proteins common to all genomes are labeled as “All”.
